# Supplementary material
Source: publisher figshare collection journal article supplement (https://gsajournals.figshare.com/ndownloader/files/23763965)
Supplement: Supplementary file 1 [file 23763965]

Env,Experiment,Year,Latitude,Longitude,Soil.Type..From.websoilsurvey.,Sand,Silt,Clay
ARH1_2016,ARH1,2016,34.728333,-90.760278,"99.1% Silt Loam, 0.9% Sandy Loam",22.27015,64.87461,12.85523
DEH1_2014,DEH1,2014,38.637405,-75.204048,100% Loamy Sand,81.87,12.58,5.548
DEH1_2015,DEH1,2015,38.62932,-75.465731,100% Loamy Sand,81.87,12.58,5.548
DEH1_2016,DEH1,2016,38.648453,-75.45161,Sandy Loam,75,13,12
GAH1_2014,GAH1,2014,31.506544,-83.555016,100% Loamy Sand,81.87,12.58,5.548
GAH1_2015,GAH1,2015,31.505161,-83.55518,100% Loamy Sand,81.87,12.58,5.548
GAH1_2016,GAH1,2016,31.50743,-83.558661,100% Loamy Sand,81,11,8
GAH2_2016,GAH2,2016,33.71722,-83.31133,"45.4% Sandy Loam, 15.7% Silt Loam, 38.7% Loam",56,25,19
IAH1_2016,IAH1,2016,41.99750188,-93.69989887,"58.5% Clay Loam, 37.7% Loam, 3.8% Silt Loam",37.767,38.81103,23.42192
IAH1ab_2014,IAH1ab,2014,41.99653,-93.696188,"57.6% Loam, 40.3% Clay Loam, 2.1% Silty Loam",37.87623,38.22423,23.89954
IAH2_2014,IAH2,2014,42.066206,-94.727606,"90.6% Loam, 9.4% Clay Loam",41.03718,39.61253,19.35029
IAH2_2016,IAH2,2016,42.06591034,-94.7274477,"90.6% Loam, 9.4% Clay Loam",41.03718,39.61253,19.35029
IAH3_2014,IAH3,2014,41.98713,-92.259751,100% Silty Clay Loam,10,57,33
IAH3_2016,IAH3,2016,41.987383,-92.2601563,100% Silty Clay Loam,10,57,33
IAH4_2014,IAH4,2014,41.198645,-91.486943,100% Silty Clay Loam,10,57,33
IAH4_2016,IAH4,2016,41.198693,-91.486205,100% Silty Clay Loam,10,57,33
ILH1_2014,ILH1,2014,40.061135,-88.233184,"64.2% Silt Loam, 35.8% Silty Clay Loam",17.62757,62.28886,20.08357
ILH1_2015,ILH1,2015,40.059337,-88.234116,"64.2% Silt Loam, 35.8% Silty Clay Loam",17.62757,62.28886,20.08357
ILH1_2016,ILH1,2016,40.061188,-88.234042,"64.2% Silt Loam, 35.8% Silty Clay Loam",17,55,28
INH1_2014,INH1,2014,40.488,-87.006,"66.1% Silty Clay Loam, 33.9% Silt Loam",14.02764,59.79271,26.17964
INH1_2015,INH1,2015,40.47666,-87.0004,"61% Silty Clay Loam, 39% Silt Loam",14.63357,60.21286,25.1537
INH1_2016,INH1,2016,40.47925,-88.990125,"61% Silty Clay Loam, 39% Silt Loam",20,50,30
KSH2_2016,KSH2,2016,37.99671,-100.814872,Loam,37,41,22
MIH1_2016,MIH1,2016,42.689878,-84.497939,Sandy Loam,54,29,17
MNH1_2014,MNH1,2014,44.06971707,-93.53409096,"96.6% Clay Loam, 3.4% Loam",33.30162,34.21062,32.48776
MNH1_2015,MNH1,2015,44.070847,-93.535534,"96.6% Clay Loam, 3.4% Loam",33.30162,34.21062,32.48776
MNH1_2016,MNH1,2016,44.066804,-93.533063,"96.6% Clay Loam, 3.4% Loam",42,30,28
MOH1_2014,MOH1,2014,38.898702,-92.20997,100% Silt Loam,21.88,65.24,12.88
MOH1_2016,MOH1,2016,38.89592,-92.20742,100% Silt Loam,21,56,23
MOH1_MOH2_2015,MOH1_MOH2,2015,38.896247,-92.208164,100% Silt Loam,21.88,65.24,12.88
MOH2_2014,MOH2,2014,38.928745,-92.352163,"99.7% Silt Loam, 0.3% Clay Loam",21.91431,65.14438,12.94131
NCH1_2014,NCH1,2014,35.29921111,-77.57159444,100% Sandy Loam,65.13,24.85,10.02
NCH1_2015,NCH1,2015,35.29597778,-77.56711667,"52.8% Sandy Loam, 47.2% Loam",54.14949,32.093,13.757
NCH1_2016,NCH1,2016,35.29922,-77.570362,Sandy Loam,70,22,8
NEH1_2014,NEH1,2014,40.834392,-96.656687,"99.9% Silt Loam, 0.1% Silty Clay Loam",21.86907,65.22986,12.90107
NEH1_2016,NEH1,2016,41.14563,-96.497956,"78.7% Silty Clay Loam, 12.3% Loam, 9.1% Silt Loam",33.11231,37.63863,29.34906
NEH1_NEH4_2015,NEH1_NEH4,2015,41.159394,-96.414561,"53% Silty Clay Loam, 47% Silt Loam",15.584,60.872,23.544
NEH2_2014,NEH2,2014,41.052978,-100.749467,100% Silt Loam,21.88,65.24,12.88
NEH2_2015,NEH2,2015,41.05136,-100.7463,100% Silt Loam,21.88,65.24,12.88
NEH3_2014,NEH3,2014,41.16353,-101.99598,100% Loam,41.87,40.19,17.93
NEH3_2015,NEH3,2015,41.158431,-101.988324,100% Loam,41.87,40.19,17.93
NYH1_2014,NYH1,2014,42.728765,-76.651654,100% Silt Loam,21.88,65.24,12.88
NYH2_2015,NYH2,2015,42.7328868,-76.6520083,100% Silt Loam,21.88,65.24,12.88
NYH2_2016,NYH2,2016,42.72543,-76.6551,Loam,43,36,21
NYH3_2015,NYH3,2015,42.723533,-76.656415,100% Silt Loam,21.88,65.24,12.88
OHH1_2015,OHH1,2015,39.855359,-83.665356,"46.9% Silty Clay Loam, 53.1% Silt Loam",22.213,44.787,33
OHH1_2016,OHH1,2016,39.860536,-83.675091,Loam,46,32,22
ONH1_2014,ONH1,2014,43.497025,-80.42696111,,23,46,31
ONH1_2015,ONH1,2015,43.498449,-80.4489,,23,46,31
ONH1_2016,ONH1,2016,43.497786,-80.451464,Clay Loam,23,46,31
ONH2_2014,ONH2,2014,42.45419722,-81.88311111,Loam,43,43,14
ONH2_2015,ONH2,2015,42.453461,-81.882117,Loam,43,43,14
ONH2_2016,ONH2,2016,42.452816,-81.883474,Loam,43,43,14
SDH1_2015,SDH1,2015,44.208912,-102.929751,"4.1% Silty Clay Loam, 45.8% Clay Loam, 25.9% Clay, 24.1% Silt Loam",22.44298,43.48235,33.97467
TXH1_2014,TXH1,2014,30.54684444,-96.43394444,100% Clay,19.61,17.19,63.19
TXH1_2015,TXH1,2015,30.546919,-96.434358,100% Clay,19.61,17.19,63.19
TXH2_2014,TXH2,2014,34.18466667,-101.9494444,"Loam, Sand Loam, Clay Loam (50/25/25)",45.46695,34.81025,19.7228
TXH2_2015,TXH2,2015,34.18466667,NA,"Loam, Sand Loam, Clay Loam (50/25/25)",45.46695,34.81025,19.7228
WIH1_2014,WIH1,2014,43.05706111,-89.53098611,"99.8% Silt Loam, 0.2% Loam",21.92093,65.18801,12.89106
WIH1_2015,WIH1,2015,43.05619,-89.332619,"99.8% Silt Loam, 0.2% Loam",21.92093,65.18801,12.89106
WIH1_2016,WIH1,2016,43.055814,-89.531719,"99.8% Silt Loam, 0.2% Loam",19,54,27
WIH2_2015,WIH2,2015,43.326583,-89.332619,"99.1% Silt Loam, 0.9% Loam",22.06086,65.01271,12.92643
WIH2_2016,WIH2,2016,43.325958,-89.340114,"99.1% Silt Loam, 0.9% Loam",23,51,26
